# Supplementary material for: Clinical Applications of Mixed Reality and 3D Printing in Congenital Heart Disease
Source: MDPI journal article supplement (doi:10.3390/biom12111548), 2022-10-24
Supplement: s1 [file s1]

**SURVEY: Cardiac surgeons, Interventional cardiologists**

|                                                              |                                                                                               |
|--------------------------------------------------------------|-----------------------------------------------------------------------------------------------|
| Age                                                          |                                                                                               |
| Gender                                                       |                                                                                               |
| Medical Specialty                                            | <input type="checkbox"/> Cardiac surgeon <input type="checkbox"/> Interventional cardiologist |
| Have you ever used AR before?                                | <input type="checkbox"/> Yes <input type="checkbox"/> No                                      |
| Have you ever used 3D printing technology in your specialty? | <input type="checkbox"/> Yes <input type="checkbox"/> No                                      |

**Please rank the following with 1 being the highest/ best, and 3 being the lowest/ worst.**

| Questions                                                                                             | ATRIAL SEPTAL DEFECT |                   |            | DOUBLE OUTLET RT VENTRICLE |                   |            |
|-------------------------------------------------------------------------------------------------------|----------------------|-------------------|------------|----------------------------|-------------------|------------|
|                                                                                                       | DICOM images         | 3D printed models | HoloLens 2 | DICOM images               | 3D printed models | HoloLens 2 |
| 1. The major vessels of the heart can be well assessed.                                               |                      |                   |            |                            |                   |            |
| 2. The heart defects can be easily appreciated.                                                       |                      |                   |            |                            |                   |            |
| 3. The spatial relationship between the cardiac structures can be easily understood.                  |                      |                   |            |                            |                   |            |
| 4. The model offers a good depth perception for the heart structures.                                 |                      |                   |            |                            |                   |            |
| 5. I prefer the use of this method to learn about the pathology.                                      |                      |                   |            |                            |                   |            |
| 6. I prefer the use of this method to communicate with another health professional during discussion. |                      |                   |            |                            |                   |            |
| 7. I prefer the use of this method to communicate with patients about the pathology.                  |                      |                   |            |                            |                   |            |
| 8. This model prepares me for surgery.                                                                |                      |                   |            |                            |                   |            |
| 9. This model helps me to understand the possible complications related to the procedure/ surgery.    |                      |                   |            |                            |                   |            |
| 10. I am likely to consult this model for preoperative planning.                                      |                      |                   |            |                            |                   |            |
| 11. This model can be helpful for intraoperative guidance.                                            |                      |                   |            |                            |                   |            |

12. How do you feel about the ability to change the clipping plane on the AR models?

13. Additional comments:

SURVEY: Radiologists, doctors, junior doctors

|                                                              |                                                          |
|--------------------------------------------------------------|----------------------------------------------------------|
| Age                                                          |                                                          |
| Gender                                                       |                                                          |
| Medical Specialty & Year of Experience                       |                                                          |
| Have you ever used AR before?                                | <input type="checkbox"/> Yes <input type="checkbox"/> No |
| Have you ever used 3D printing technology in your specialty? | <input type="checkbox"/> Yes <input type="checkbox"/> No |

Please rank the following with 1 being the highest/ best, and 3 being the lowest/ worst.

| Questions                                                                                             | ATRIAL SEPTAL DEFECT |                   |            | DOUBLE OUTLET RT VENTRICLE |                   |            |
|-------------------------------------------------------------------------------------------------------|----------------------|-------------------|------------|----------------------------|-------------------|------------|
|                                                                                                       | DICOM images         | 3D printed models | HoloLens 2 | DICOM images               | 3D printed models | HoloLens 2 |
| 1. The major vessels of the heart can be well assessed.                                               |                      |                   |            |                            |                   |            |
| 2. The heart defects can be easily appreciated.                                                       |                      |                   |            |                            |                   |            |
| 3. The spatial relationship between the cardiac structures can be easily understood.                  |                      |                   |            |                            |                   |            |
| 4. The model offers a good depth perception for the heart structures.                                 |                      |                   |            |                            |                   |            |
| 5. I prefer the use of this method to learn about the pathology.                                      |                      |                   |            |                            |                   |            |
| 6. I prefer the use of this method to communicate with another health professional during discussion. |                      |                   |            |                            |                   |            |
| 7. I prefer the use of this method to communicate with patients about the pathology.                  |                      |                   |            |                            |                   |            |

8. How do you feel about the ability to change the clipping plane on the AR models?

9. Additional comments:
