# Supplementary material for: Clinical Applications of Mixed Reality and 3D Printing in Congenital Heart Disease
Source: MDPI journal article supplement (doi:10.3390/biom12111548), 2022-10-24
Supplement: s1 [file s1]

### Supplementary File S3:

Table: Skewness and kurtosis for each question

| Question                                               | Modality | Atrial Septal Defect |          | Double Outlet Right Ventricle |          |
|--------------------------------------------------------|----------|----------------------|----------|-------------------------------|----------|
|                                                        |          | Skewness             | Kurtosis | Skewness                      | Kurtosis |
| 1. Assessment of major vessels                         | DICOM    | 0.297                | -1.595   | -0.181                        | -1.787   |
|                                                        | 3DP      | -0.034               | -0.651   | -0.078                        | -0.804   |
|                                                        | MR       | -0.244               | -1.809   | 0.297                         | -1.595   |
| 2. Appreciation of heart defects                       | DICOM    | -1.104               | -0.570   | -1.151                        | -0.156   |
|                                                        | 3DP      | 0.764                | -0.722   | 0.414                         | -1.026   |
|                                                        | MR       | 0.100                | -0.625   | 0.487                         | -1.032   |
| 3. Spatial relationship between the cardiac structures | DICOM    | -1.375               | 0.329    | -1.737                        | 1.572    |
|                                                        | 3DP      | 0.435                | -0.862   | 0.248                         | -1.101   |
|                                                        | MR       | 0.513                | -0.865   | 0.538                         | -0.735   |
| 4. Depth perception                                    | DICOM    | -1.897               | 2.106    | -1.589                        | 1.121    |
|                                                        | 3DP      | 0.354                | -0.678   | 0.213                         | -0.867   |
|                                                        | MR       | 0.677                | -0.489   | 0.884                         | -0.247   |
| 5. Pathology learning                                  | DICOM    | -1.497               | 0.637    | -1.184                        | -0.267   |
|                                                        | 3DP      | 0.435                | -0.862   | 0.186                         | -1.027   |
|                                                        | MR       | 0.486                | -0.592   | 0.677                         | -0.489   |
| 6. Communication tool with another health professional | DICOM    | 0.000                | -1.771   | -0.297                        | -1.595   |
|                                                        | 3DP      | 0.344                | -0.997   | 0.449                         | -1.194   |
|                                                        | MR       | -0.403               | -1.343   | -0.162                        | -1.368   |
| 7. Communication tool with patients                    | DICOM    | -1.214               | 0.556    | -1.233                        | 0.638    |
|                                                        | 3DP      | 2.986                | 8.127    | 2.728                         | 6.050    |
|                                                        | MR       | 0.079                | -0.144   | 0.067                         | 0.253    |
| 8. Prepares me for surgery / intervention              | DICOM    | -0.485               | -1.532   | -0.574                        | -1.282   |
|                                                        | 3DP      | 0.000                | -0.685   | -0.249                        | -1.225   |
|                                                        | MR       | 0.485                | -1.532   | 0.847                         | -0.538   |
| 9. Helps to understand possible complications          | DICOM    | -0.454               | -1.480   | -0.851                        | -0.765   |
|                                                        | 3DP      | 0.139                | -1.008   | 0.000                         | -1.392   |
|                                                        | MR       | 0.269                | -1.659   | 0.773                         | -0.587   |
| 10. Pre-operative planning                             | DICOM    | -0.988               | -0.578   | -0.851                        | -0.765   |
|                                                        | 3DP      | 0.228                | -1.140   | -0.139                        | -1.008   |
|                                                        | MR       | 0.601                | -0.974   | 1.068                         | -0.168   |
| 11. Intra-operative guidance                           | DICOM    | -0.851               | -0.765   | -0.851                        | -0.765   |
|                                                        | 3DP      | 0.139                | -1.008   | -0.076                        | -1.223   |
|                                                        | MR       | 0.647                | -1.190   | 0.916                         | -0.414   |

3DP, three-dimensional printing; DICOM, Digital Imaging and Communications in Medicine; MR, mixed reality
