# Supplementary material for: Clinical Applications of Mixed Reality and 3D Printing in Congenital Heart Disease
Source: MDPI journal article supplement (doi:10.3390/biom12111548), 2022-10-24
Supplement: s1 [file s1]

## Supplementary File S4:

Table: Comparison of the mean ranks difference of both CHD

| Question                                               | Modality | Mean difference (ASD-DORV) | p-value <sup>a</sup> |
|--------------------------------------------------------|----------|----------------------------|----------------------|
| 1. Assessment of major vessels                         | DICOM    | -0.24                      | 0.26                 |
|                                                        | 3DP      | -0.03                      | 0.44                 |
|                                                        | MR       | 0.27                       | 0.16                 |
| 2. Appreciation of heart defects                       | DICOM    | -0.03                      | 0.72                 |
|                                                        | 3DP      | -0.14                      | 0.65                 |
|                                                        | MR       | 0.17                       | 0.43                 |
| 3. Spatial relationship between the cardiac structures | DICOM    | -0.09                      | 0.50                 |
|                                                        | 3DP      | -0.11                      | 0.55                 |
|                                                        | MR       | 0.21                       | 0.39                 |
| 4. Depth perception                                    | DICOM    | 0.06                       | 0.68                 |
|                                                        | 3DP      | -0.11                      | 0.42                 |
|                                                        | MR       | 0.06                       | 0.35                 |
| 5. Pathology learning                                  | DICOM    | 0.09                       | 0.82                 |
|                                                        | 3DP      | -0.14                      | 0.25                 |
|                                                        | MR       | 0.06                       | 0.32                 |
| 6. Communication tool with another health professional | DICOM    | -0.15                      | 0.01                 |
|                                                        | 3DP      | 0.03                       | 0.44                 |
|                                                        | MR       | 0.12                       | 0.11                 |
| 7. Communication tool with patients                    | DICOM    | -0.06                      | 0.09                 |
|                                                        | 3DP      | -0.03                      | 0.77                 |
|                                                        | MR       | 0.09                       | 0.22                 |
| 8. Prepares me for surgery / intervention              | DICOM    | -0.04                      | 0.88                 |
|                                                        | 3DP      | -0.14                      | 0.78                 |
|                                                        | MR       | 0.18                       | 0.80                 |
| 9. Helps to understand possible complications          | DICOM    | -0.17                      | 0.02                 |
|                                                        | 3DP      | -0.09                      | 0.79                 |
|                                                        | MR       | 0.26                       | 0.09                 |
| 10. Pre-operative planning                             | DICOM    | 0.04                       | 0.74                 |
|                                                        | 3DP      | 0.10                       | 0.09                 |
|                                                        | MR       | 0.18                       | 0.42                 |
| 11. Intra-operative guidance                           | DICOM    | 0.00                       | 0.45                 |
|                                                        | 3DP      | -0.13                      | 0.23                 |
|                                                        | MR       | 0.13                       | 0.17                 |

<sup>a</sup> after Bonferroni correction

3DP, three-dimensional printing; DICOM, Digital Imaging and Communications in Medicine; MR, mixed reality
